# Supplementary material for: Forefoot Function after Hallux Valgus Surgery: A Systematic Review and Meta-Analysis on Plantar Load Measurement
Source: MDPI journal article supplement (doi:10.3390/jcm12041384), 2023-02-09
Supplement: s1 [file s1]

**Table S2. Methodological Quality Assessment using NIH Quality Assessment Tool for Before-after Study**

|                             | Study Question | Eligibility | Representativeness | Enrollment Criteria | Intervention | Outcome Measures | Assessor Blinding | Follow-up | Multiple Measure | Sum (out of 9) |
|-----------------------------|----------------|-------------|--------------------|---------------------|--------------|------------------|-------------------|-----------|------------------|----------------|
| Borton and Stephens [32]    | 0              | 0           | 1                  | 0                   | 1            | 0                | 0                 | 1         | 0                | 3              |
| Brodsky, et al. [26]        | 1              | 0           | 0                  | 0                   | 1            | 0                | 0                 | 1         | 1                | 4              |
| Bryant, et al. [33]         | 0              | 1           | 0                  | 1                   | 0            | 1                | 0                 | 1         | 1                | 5              |
| Cancilleri, et al. [34]     | 1              | 0           | 0                  | 1                   | 1            | 0                | 0                 | 1         | 0                | 4              |
| Chopra, et al. [35]         | 1              | 0           | 1                  | 1                   | 1            | 1                | 0                 | 1         | 1                | 7              |
| Costa, et al. [36]          | 1              | 0           | 0                  | 1                   | 1            | 0                | 0                 | 1         | 1                | 5              |
| Gutteck, et al. [37]        | 0              | 0           | 1                  | 1                   | 0            | 0                | 0                 | 1         | 0                | 3              |
| Jones, et al. [38]          | 1              | 0           | 1                  | 1                   | 1            | 0                | 0                 | 1         | 1                | 6              |
| Kernozek and Sterriker [39] | 1              | 0           | 0                  | 1                   | 1            | 0                | 0                 | 1         | 1                | 5              |
| King, et al. [55]           | 1              | 1           | 1                  | 1                   | 1            | 0                | 0                 | 1         | 1                | 7              |
| Klemola, et al. [40]        | 1              | 1           | 0                  | 1                   | 1            | 0                | 1                 | 1         | 0                | 6              |
| Lipscombe, et al. [41]      | 1              | 1           | 1                  | 1                   | 1            | 0                | 0                 | 0         | 1                | 6              |
| Lorei, et al. [25]          | 1              | 1           | 1                  | 1                   | 1            | 0                | 0                 | 1         | 1                | 7              |
| Martinez-Nova, et al. [43]  | 1              | 1           | 0                  | 1                   | 1            | 1                | 0                 | 1         | 1                | 7              |
| Martinez-Nova, et al. [42]  | 1              | 0           | 0                  | 1                   | 1            | 1                | 0                 | 1         | 1                | 6              |
| Mittal, et al. [44]         | 1              | 1           | 0                  | 1                   | 1            | 0                | 0                 | 1         | 1                | 6              |
| Moerenhout, et al. [45]     | 1              | 1           | 1                  | 1                   | 0            | 1                | 0                 | 1         | 1                | 7              |
| Nyska, et al. [46]          | 1              | 0           | 0                  | 0                   | 1            | 0                | 0                 | 1         | 0                | 3              |
| Resch and Stenström [47]    | 0              | 0           | 1                  | 0                   | 0            | 0                | 0                 | 1         | 1                | 3              |
| Saro, et al. [48]           | 1              | 1           | 1                  | 1                   | 0            | 1                | 0                 | 1         | 1                | 7              |
| Schuh, et al. [50]          | 1              | 0           | 1                  | 0                   | 1            | 1                | 0                 | 1         | 1                | 6              |
| Schuh, et al. [49]          | 1              | 0           | 1                  | 0                   | 1            | 1                | 0                 | 1         | 1                | 6              |
| Togei, et al. [51]          | 1              | 0           | 0                  | 0                   | 1            | 0                | 0                 | 1         | 1                | 4              |
| Verdu-Roman, et al. [54]    | 1              | 1           | 1                  | 1                   | 1            | 1                | 0                 | 1         | 1                | 8              |
| Wong, et al. [52]           | 0              | 0           | 1                  | 0                   | 1            | 0                | 0                 | 1         | 1                | 4              |
| Yildiz, et al. [53]         | 0              | 0           | 1                  | 1                   | 1            | 1                | 1                 | 1         | 0                | 6              |
| Sum (26 articles)           | 20             | 10          | 15                 | 18                  | 21           | 10               | 2                 | 25        | 20               |                |
