# Supplementary material for: Forefoot Function after Hallux Valgus Surgery: A Systematic Review and Meta-Analysis on Plantar Load Measurement
Source: MDPI journal article supplement (doi:10.3390/jcm12041384), 2023-02-09
Supplement: s1 [file s1]

**Table S1. Search Strategies per database**

| Database                        | Field                                          | Filter                                                                                        | Search Terms                                                                                                                                                                                                                                                 |
|---------------------------------|------------------------------------------------|-----------------------------------------------------------------------------------------------|--------------------------------------------------------------------------------------------------------------------------------------------------------------------------------------------------------------------------------------------------------------|
| Web of Science                  | Title, abstract, keywords, keywords plus       | Type: Article<br>Language: English                                                            | "plantar load" OR "plantar pressure" OR pedobarograph* OR barograph* OR baropodometr*                                                                                                                                                                        |
| Scopus                          | Title, abstract, keywords,                     | Type: Article<br>Source: Journal<br>Language: English                                         | AND<br><br>bunion OR "hallux valgus" OR "hallux abducto valgus" OR "hallux abductovalgus" OR "hallux varus"                                                                                                                                                  |
| Ovid (Search All Ovid Journals) | Title, abstract, keywords,                     | Type: Article                                                                                 | AND                                                                                                                                                                                                                                                          |
| CINAHL Complete via EBSCOHost   | Not specified (i.e. Select a field [optional]) | Type: Research Article<br>Language: English, Apply related words<br>Apply equivalent subjects | AND<br><br>osteotom* OR arthrodesis OR fusion OR surgery OR surgical OR "tissue procedure" OR arthroscop* OR implant OR arthroplasty OR osteodesis OR syndesmosis OR suture OR tightrope                                                                     |
| CENTRAL, Cochrane               | Title, Abstract, keywords                      | N/A                                                                                           | "plantar load" OR "plantar pressure" OR pedobarograph* OR barograph* OR baropodometr*                                                                                                                                                                        |
| Pubmed                          | Title, Abstract                                | Type: Journal Article<br>Language: English                                                    | AND<br><br>Bunion [MeSH Terms] OR hallux valgus [MeSH Terms]<br><br>AND<br><br>osteotom* OR arthrodesis OR fusion OR surgery OR surgical OR "tissue procedure" OR arthroscop* OR implant OR arthroplasty OR osteodesis OR syndesmosis OR suture OR tightrope |
